# Supplementary material for: Haiku: New paradigm for the reverse genetics of emerging RNA viruses
Source: PubMed Central journal article supplement (PMC5811033; doi:10.1371/journal.pone.0193069), 2018-02-13
Supplement: pone.0193069.s001.pdf [file pone.0193069.s001.pdf]

## S1 Text. Supplemental data

### Haiku: new paradigm for the reverse genetics of RNA viruses

Thérèse Atieh, Miriam Diala El Ayoubi, Fabien Aubry, Stéphane Priet, Xavier de Lamballerie

and Antoine Nougairède

**Table A: Origin of the initial material used to generate subgenomic amplicons by PCR/RT-PCR**  
DNS and I.C. mean *de novo* synthesis and infectious clone respectively. pCMV-I, pCMV-tag, I, II, III, III-HDR/SV40pA and Tag-HDR/SV40pA refer to the name of the amplicons described in fig 1.

| Designs | Nb of amplicons | Viruses | Origin of initial material |            |                |                      |                |
|---------|-----------------|---------|----------------------------|------------|----------------|----------------------|----------------|
|         |                 |         | pCMV-I                     | II         | III-HDR/SV40pA |                      |                |
| ISA     | 3               |         |                            |            |                |                      |                |
|         |                 | JEV     | DNS-I JEV                  | DNS-II JEV | DNS-III JEV    |                      |                |
|         |                 | HRV-14  | HRV-14 I.C.                | Viral RNA  | HRV-14 I.C.    |                      |                |
| A       | 4               |         | pCMV-tag                   | I          | II             | III-HDR/SV40pA       |                |
|         |                 | JEV     | DNS-I Dengue               | Viral RNA  | DNS-II JEV     | DNS-III JEV          |                |
|         |                 | HRV-14  |                            |            | Viral RNA      | HRV-14 I.C.          |                |
|         |                 | CHIKV   |                            |            |                | CHIKV I.C.           |                |
|         |                 | E-30    |                            |            |                | Viral RNA + DNS E-30 |                |
|         |                 |         |                            |            |                |                      |                |
| B       | 4               |         | pCMV-I                     | II         | III            | Tag-HDR/SV40pA       |                |
|         |                 | JEV     | DNS-I JEV                  | DNS-II JEV | Viral RNA      | CHIKV I.C.           |                |
|         |                 | HRV-14  | HRV-14 I.C.                | Viral RNA  | CHIKV I.C.     |                      |                |
| C       | 5               |         | pCMV-tag                   | I          | II             | III                  | Tag-HDR/SV40pA |
|         |                 | JEV     | DNS-I Dengue               | Viral RNA  | DNS-II JEV     | Viral RNA            | CHIKV I.C.     |
|         |                 | HRV-14  |                            |            | Viral RNA      |                      |                |
|         |                 |         |                            |            |                |                      |                |
| D       | 3               |         | pCMV-I                     | II         | III            |                      |                |
|         |                 | JEV     | DNS-I JEV                  | DNS-II JEV | Viral RNA      |                      |                |
|         |                 | HRV-14  | HRV-14 I.C.                | Viral RNA  |                |                      |                |
| E       | 4               |         | pCMV-tag                   | I          | II             | III                  |                |
|         |                 | JEV     | DNS-I Dengue               | Viral RNA  | DNS-II JEV     | Viral RNA            |                |
|         |                 | HRV-14  |                            |            | Viral RNA      |                      |                |
|         |                 | TBEV    |                            |            | Viral RNA      |                      |                |
|         |                 |         |                            |            |                |                      |                |

**Table B: Primers used to obtain DNA fragments described by PCR/RT-PCR**

Primers located respectively at the 5' and 3' terminus of the pCMV (¶) and the HDR/SV40pA (£). Primers located at the 3' extremity of pCMV and extended by the 30 first nucleotides of the viral genome (◇). Primers located at the 5' extremity of HDR/SV40pA and extended by the 30 last nucleotides of the viral genome (□).

\*All positions based on complete viral strain sequence

| Designs | DNA fragment   |             | Primer Forward                                        | Position* | Primer Reverse                                           | Position *  |
|---------|----------------|-------------|-------------------------------------------------------|-----------|----------------------------------------------------------|-------------|
|         | Name           | Length (bp) |                                                       |           |                                                          |             |
| JEV     | pCMV-I         | 4815        | CACCCAAGTATCTTCAGCATCT                                | ¶         | GAAGAATGATTCTGTAAGTGCCAG                                 | 4032-4057   |
|         | II             | 3003        | CGTTGCCATGCCAATCTTAGCG                                | 3980-4002 | GGTGCTTGCCTCCACCAA                                       | 6961-6983   |
|         | III-HDR/SV40pA | 4247        | CAAATGAGTATGGAATGCTGGAAAA                             | 6910-6935 | CTCAGGGTCAATGCCAGCGCTT                                   | £           |
| A       | pCMV-tag       | 789         | CACCCAAGTATCTTCAGCATCT                                | ¶         | TAAGCCAAGAAGTTCACACAGATAAACTTCTCGGTTCA<br>CTAACGAGCTCTGC | ◇           |
|         | I              | 4057        | AGAAGTTTATCTGTGTAAGTCTT                               | 0-24      | GAAGAATGATTCTGTAAGTGCCAG                                 | 4032-4057   |
|         | II             | 3003        | CGTTGCCATGCCAATCTTAGCG                                | 3980-4002 | GGTGCTTGCCTCCACCAA                                       | 6961-6983   |
|         | III-HDR/SV40pA | 4247        | CAAATGAGTATGGAATGCTGGAAAA                             | 6910-6935 | CTCAGGGTCAATGCCAGCGCTT                                   | £           |
| B       | pCMV-I         | 4815        | CACCCAAGTATCTTCAGCATCT                                | ¶         | GAAGAATGATTCTGTAAGTGCCAG                                 | 4032-4057   |
|         | II             | 3003        | CGTTGCCATGCCAATCTTAGCG                                | 3980-4002 | GGTGCTTGCCTCCACCAA                                       | 6961-6983   |
|         | III            | 4055        | CAAATGAGTATGGAATGCTGGAAAA                             | 6910-6935 | AGATCCTGTGTTCTTCTCACC                                    | 10943-10965 |
|         | tag-HDR/SV40pA | 224         | GTAGCTGGTGGTGAGGAAGAACACAGGATCTGGCCGGCATGGTCCC<br>AGC | □         | CTCAGGGTCAATGCCAGCGCTT                                   | £           |
| C       | pCMV-tag       | 789         | CACCCAAGTATCTTCAGCATCT                                | ¶         | TAAGCCAAGAAGTTCACACAGATAAACTTCTCGGTTCA<br>CTAACGAGCTCTGC | ◇           |
|         | I              | 4057        | AGAAGTTTATCTGTGTAAGTCTT                               | 0-24      | GAAGAATGATTCTGTAAGTGCCAG                                 | 4032-4057   |
|         | II             | 3003        | CGTTGCCATGCCAATCTTAGCG                                | 3980-4002 | GGTGCTTGCCTCCACCAA                                       | 6961-6983   |
|         | III            | 4055        | CAAATGAGTATGGAATGCTGGAAAA                             | 6910-6935 | AGATCCTGTGTTCTTCTCACC                                    | 10943-10965 |
|         | tag-HDR/SV40pA | 224         | GTAGCTGGTGGTGAGGAAGAACACAGGATCTGGCCGGCATGGTCCC<br>AGC | □         | CTCAGGGTCAATGCCAGCGCTT                                   | £           |
| D       | pCMV-I         | 4815        | CACCCAAGTATCTTCAGCATCT                                | ¶         | GAAGAATGATTCTGTAAGTGCCAG                                 | 4032-4057   |

|               |                |      |                                               |           |                                                           |             |
|---------------|----------------|------|-----------------------------------------------|-----------|-----------------------------------------------------------|-------------|
|               | II             | 3003 | CGTTGCCATGCCAATCTTAGCG                        | 3980-4002 | GGTGCTTGCCTCCACCAA                                        | 6961-6983   |
|               | III            | 4055 | CAAATGAGTATGGAATGCTGGAAAA                     | 6910-6935 | AGATCCTGTGTTCTTCTCACC                                     | 10943-10965 |
| E             | pCMV-tag       | 789  | CACCCAAGTATCTTACGATCT                         | ¶         | TAAGCCAAGAAGTTCACACAGATAAACTTCTCGGTTCA<br>CTAAACGAGCTCTGC | ◇           |
|               | I              | 4057 | AGAAGTTTATCTGTGTGAACTTCT                      | 0-24      | GAAGAATGATTCTGTAAAGTGCCAG                                 | 4032-4057   |
|               | II             | 3003 | CGTTGCCATGCCAATCTTAGCG                        | 3980-4002 | GGTGCTTGCCTCCACCAA                                        | 6961-6983   |
|               | III            | 4055 | CAAATGAGTATGGAATGCTGGAAAA                     | 6910-6935 | AGATCCTGTGTTCTTCTCACC                                     | 10943-10965 |
| <b>HRV-14</b> |                |      |                                               |           |                                                           |             |
| ISA           | pCMV-I         | 3089 | TCGACTCTAGAGGATCTCGAT                         | ¶         | GAGTGCAACAGTCTGTGAGATA                                    | 2301-2323   |
|               | II             | 2534 | CGACCGCCAGGTCTACTTA                           | 2222-2242 | AGATGGTTGATGGCAATCTT                                      | 4736-4756   |
|               | III-HDR/SV40pA | 2806 | CTTGAATCCTGAAGCTTTAGTCA                       | 4623-4646 | CTCAGGGTCAATGCCAGCGCTT                                    | £           |
| A             | pCMV-tag       | 812  | GAATAAGGGCGACACGGAAATGT                       | ¶         | CGAATGGTGGGATACCCATCCGCTGTTTTAACGGTTCA<br>CTAAACGAGCTCT   | ◇           |
|               | I              | 2323 | TTAAACAGCGGATGGGTAT                           | 0-20      | GAGTGCAACAGTCTGTGAGATA                                    | 2301-2323   |
|               | II             | 2534 | CGACCGCCAGGTCTACTTA                           | 2222-2242 | AGATGGTTGATGGCAATCTT                                      | 4736-4756   |
|               | III-HDR/SV40pA | 2806 | CTTGAATCCTGAAGCTTTAGTCA                       | 4623-4646 | CTCAGGGTCAATGCCAGCGCTT                                    | £           |
| B             | pCMV-I         | 3089 | TCGACTCTAGAGGATCTCGAT                         | ¶         | GAGTGCAACAGTCTGTGAGATA                                    | 2301-2323   |
|               | II             | 2534 | CGACCGCCAGGTCTACTTA                           | 2222-2242 | AGATGGTTGATGGCAATCTT                                      | 4736-4756   |
|               | III            | 2614 | CTTGAATCCTGAAGCTTTAGTCA                       | 4623-4646 | TTTTTTTTTTTTTTTTTTTTTTTTATAAACTCCTACTTCTA<br>CTC          | 7193-7237   |
|               | tag-HDR/SV40pA | 217  | AAAAAAAAAAAAAAAAAAAAAAAAAAGCCGGCATGGTCCCAGCCT | □         | CTCAGGGTCAATGCCAGCGCTT                                    | £           |
| C             | pCMV-tag       | 812  | GAATAAGGGCGACACGGAAATGT                       | ¶         | CGAATGGTGGGATACCCATCCGCTGTTTTAACGGTTCA<br>CTAAACGAGCTCT   | ◇           |
|               | I              | 2323 | TTAAACAGCGGATGGGTAT                           | 0-20      | GAGTGCAACAGTCTGTGAGATA                                    | 2301-2323   |
|               | II             | 2534 | CGACCGCCAGGTCTACTTA                           | 2222-2242 | AGATGGTTGATGGCAATCTT                                      | 4736-4756   |
|               | III            | 2614 | CTTGAATCCTGAAGCTTTAGTCA                       | 4623-4646 | TTTTTTTTTTTTTTTTTTTTTTTTATAAACTCCTACTTCTA<br>CTC          | 7193-7237   |
|               | tag-HDR/SV40pA | 217  | AAAAAAAAAAAAAAAAAAAAAAAAAAGCCGGCATGGTCCCAGCCT | □         | CTCAGGGTCAATGCCAGCGCTT                                    | £           |
| D             | pCMV-I         | 3089 | TCGACTCTAGAGGATCTCGAT                         | ¶         | GAGTGCAACAGTCTGTGAGATA                                    | 2301-2323   |

|              |                |      |                           |           |                                                           |             |
|--------------|----------------|------|---------------------------|-----------|-----------------------------------------------------------|-------------|
|              | II             | 2534 | CGACCGGCCAGGTCTACTTA      | 2222-2242 | AGATGGTTGATGGCAATCTT                                      | 4736-4756   |
|              | III            | 2614 | CTTGAATCCTGAAGCTTAGTCA    | 4623-4646 | TTTTTTTTTTTTTTTTTTTTTTTTATAAACTCCTACTTCTA<br>CTC          | 7193-7237   |
| E            | pCMV-tag       | 812  | GAATAAGGGCGACACGGAAATGT   | ¶         | CGAATGGTGGGATACCCATCCGCTGTTTTAACGGTTCA<br>CTAAACGAGCTCT   | ◇           |
|              | I              | 2323 | TTAAAACAGCGGATGGGTAT      | 0-20      | GAGTGCAACAGTCTGTGAGATA                                    | 2301-2323   |
|              | II             | 2534 | CGACCGGCCAGGTCTACTTA      | 2222-2242 | AGATGGTTGATGGCAATCTT                                      | 4736-4756   |
|              | III            | 2614 | CTTGAATCCTGAAGCTTAGTCA    | 4623-4646 | TTTTTTTTTTTTTTTTTTTTTTTTATAAACTCCTACTTCTA<br>CTC          | 7193-7237   |
| <b>CHIKV</b> |                |      |                           |           |                                                           |             |
| A            | pCMV-tag       | 789  | CACCCAATGATCTTCAGCATCT    | ¶         | TAAGCCAAGAAGTTCACACAGATAAACTTCTCGGTTCA<br>CTAAACGAGCTCTGC | ◇           |
|              | I              | 4057 | AGAAGTTTATCTGTGGAATTCT    | 0-24      | GAAGAATGATTCTGTAAAGTGCCAG                                 | 4032-4057   |
|              | II             | 3003 | CGTTGCCATGCCAATCTTAGCG    | 3980-4002 | GGTGCTTGCCTCCTCCACCAA                                     | 6961-6983   |
|              | III-HDR/SV40pA | 4247 | CAAATGAGTATGGAATGCTGGAAAA | 6910-6935 | CTCAGGGTCAATGCCAGCGCTT                                    | £           |
| <b>E-30</b>  |                |      |                           |           |                                                           |             |
| A            | pCMV-tag       | 789  | GAATAAGGGCGACACGGAAATGT   | ¶         | TGGGTGGGAGCAACCCACAGGCTGTTTTAACGGTTCA<br>CTAAACGAGCTCT    | ◇           |
|              | I              | 2277 | TTAAAACAGCCTGTGGGTTGCTC   | 0-24      | TCGCTGGTAACATATCTGTAGT                                    | 2256-2277   |
|              | II             | 3239 | GAAAAGATGCCATGCTCGGGA     | 2166-2186 | TTCAAATGCTGGACCTTGCCT                                     | 5383-5404   |
|              | III-HDR/SV40pA | 2394 | ATCAGTGGCTGGCATAATATACA   | 5272-5294 | CTCAGGGTCAATGCCAGCGCTT                                    | £           |
| <b>TBEV</b>  |                |      |                           |           |                                                           |             |
| E            | pCMV-tag       | 789  | GAATAAGGGCGACACGGAAATGT   | ¶         | AAGCAAACGCATGCACGTGCAAGAAAATCTCGGTTCA<br>CTAAACGAGCTCTGC  | ◇           |
|              | I              | 4054 | AGATTTTCTTGACGTGCAT       | 0-20      | GCCACGCCAGGAAGAGCATGA                                     | 4033-4054   |
|              | II             | 4160 | CTGGGATTGCCAAGCGAGG       | 3866-3885 | CAACCCAGGCTTGTACCATCTTT                                   | 8003-8026   |
|              | III            | 3166 | GCAGCTTCTGACCGGCTGTCATC   | 7935-7959 | AGCGGGTGTTCCTCGAGTC                                       | 11080-11100 |

**Table C: Primers and probes used for the quantitative real-time RT-PCR assays**

| Virus  | Position    | Length | Primer Forward         | Probe                        | Primer Reverse          |
|--------|-------------|--------|------------------------|------------------------------|-------------------------|
| TBEV   | 10236-10338 | 102    | GCAGAGTGGGCCAGGAACAT   | TCGGACAAGAGAAGTTCAAGGACT     | TCCTGCATGGATCGGCATGAC   |
| CHIKV  | 2631-2810   | 179    | TGACCGCCATTGTGCATCGTTG | CTGGAGACCTCGTGTTAACGTGCTTCAG | GACCTCGTATCCACGATAGTCA  |
| E-30   | 456-601     | 145    | CCCCTGAATGCGGCTAATCC   | GGACACCCAAAGTAGTCGGTTCC      | ATTGTCACCATAAGCAGCCA    |
| JEV    | 158-217     | 59     | ACCCCGCGTATCCCACTA     | TGGGAGTGAAGAGGG              | GCCGTCCAACAAGCTCATTAC   |
| HRV-14 | 368-572     | 204    | AGCCTGCGTGGCGGCC       | CTCCGGCCCTGAATGCGGCTAA       | GAAACACGGACACCCAAAGTAGT |

**Table D: Primers used for HRV-14 infectious clone construction**

| Primer Name     | Primer Sequence                             |
|-----------------|---------------------------------------------|
| P1 F            | CGGATGCCGGGAGCAGACAA                        |
| CMV tag R       | ATGGCTAATGGCCAATATTGAATTCGCGGGATCGAGATCCT   |
| CMV tag F       | AGGATCTCGATCCCGCGAAAT TCAATATTGGCCATTAGCCAT |
| CMV ext R       | GCGCATGTGTCAATGCTTCCT                       |
| P2 F            | GATTGTAAGTGTGAGAGTGCACCAT                   |
| CMV fus R       | CGGTTCACTAAACGAGCTCT                        |
| CMV ext F       | GAATAAGGGCGACACGGAAATGT                     |
| CMV tag HRV14 R | GATACCCATCCGCTGTTTTAACGGTTCACTAAACGAGCTCT   |
| CMV tag HRV14 F | AGAGCTCGTTTAGTGAACCGTTAAAACAGCGGATGGGTATC   |
| HRV 1R          | AGCATGAGATCTTTAACTGGTT                      |
| CMV fus F       | TCAATATTGGCCATTAGCCAT                       |
| HRV 2R          | TTA GAT GGG TCC ATT GAC AGT GAT             |
| P3 F            | CCAATAGGCCGAAATCGGCAA                       |
| HRV 3R          | GGCAGTGGGTACAGCCTATA                        |

## Supplemental Methods: pWR3.26 plasmid modifications

All the following constructions were verified by full-genome sequencing. Primers are detailed in **Table D** in **S1 Text**.

First, a molecular clone of HRV14 under the control of the CMV promoter (pCMV) and harboring a 42(A)-tail was generated by PCR using the Platinum PCR SuperMix High Fidelity kit (Life Technologies) by the replacement of the T7 promoter in pWR3.26 by pCMV. Briefly, a pWR3.26 plasmid backbone region upstream of the T7 promoter and containing the Sal I restriction site was amplified by PCR using a forward primer P1F and the reverse primer CMV tag R extended with the first twenty nucleotides of the pCMV. The pCMV was amplified from a *de novo* synthesized DNA plasmid previously described<sup>8</sup>, named DNS-I Dengue, which contain the pCMV followed by the 5' extremity of the genome of the dengue virus type 4 (DENV-4) strain Dak HD 34 460 amplified using a forward primer CMV tag F extended with the last twenty nucleotides of the above amplicon and a reverse primer CMV ext R. These two amplicons were then merged by fusion PCR to obtain the F1 fragment using P2 F and CMV fus R. Similarly, another pCMV amplicon was obtained using the primers CMV tag F and CMV tag HRV14 R. An amplicon containing the beginning of the HRV14 genome and containing the Nar I restriction site was amplified using the CMV tag HRV14 F and HRV 1R. Then, a second fragment F2 was obtained after the fusion of the two latter amplicons using the primers CMV fus F and HRV 2R. The F1 and F2 fragments were fused using the primers P3 F and HRV 3R to generate a final F3 fragment, which was then digested by the restriction enzymes Sall and NarI. This fragment was cloned back into the digested pWR3.26 to generate the resulting infectious clone pWR3.26-pCMV.

Then, the molecular clone of HRV14 under the control of pCMV and harboring a 25(A)-tail followed by a hepatitis delta ribozyme and the simian virus 40 polyadenylation signal, named HRV14 I.C., was generated as follow. A synthetic DNA fragment, surrounded by the restriction sites SphI and MluI, that includes the last 630 bp of the HRV14 genome and followed by the hepatitis delta ribozyme and the simian virus 40 polyadenylation signal sequence was ordered from Genscript. The fragment was cloned

back into the SphI and MluI (New England Biolabs) digested pWR3.26-pCMV to generate the resulting infectious clone HRV14 I.C.
